# Supplementary material for: Synthesis, Properties, and Electrochemistry of bis(iminophosphorane)pyridine Iron(II) Pincer Complexes
Source: MDPI journal article supplement (doi:10.3390/inorganics12040115), 2024-04-16
Supplement: s1 [file s1]

## Supporting Information

### Synthesis, properties, and electrochemistry of bis(iminophosphorane)pyridine iron(II) pincer complexes

Nicolás Sánchez López <sup>1</sup>, Erick Nuñez Bahena <sup>1</sup>, Alexander D. Ryabov<sup>2</sup>, Pierre Sutra<sup>3</sup>, Alain Igau<sup>3</sup>, and Ronan Le Lagadec <sup>1,\*</sup>

<sup>1</sup>*Instituto de Química, UNAM, Circuito exterior s/n, Ciudad Universitaria, 04510, Ciudad de México, México*

<sup>2</sup>*Department of Chemistry, Carnegie Mellon University, 4400 Fifth Avenue, Pittsburgh, PA 15213, USA*

<sup>3</sup>*CNRS, LCC (Laboratoire de Chimie de Coordination), Université de Toulouse, 31077 Cedex 4 Toulouse, France*

\*Correspondence: [ronan@unam.mx](mailto:ronan@unam.mx)

#### Contents

|                                                                                                                                                     |    |
|-----------------------------------------------------------------------------------------------------------------------------------------------------|----|
| S1. General Considerations                                                                                                                          | 2  |
| S2. Synthesis of <b>PyN3</b>                                                                                                                        | 2  |
| S3. Synthesis of <b>ImPh</b> [2]                                                                                                                    | 4  |
| S4. Characterization of <b>ImBu</b>                                                                                                                 | 6  |
| S5. Characterization of <b>ImMe</b>                                                                                                                 | 8  |
| S6. Characterization of <b>FelMPh</b>                                                                                                               | 10 |
| S7. Characterization of <b>FelMBu</b>                                                                                                               | 13 |
| S8. Characterization of <b>FelMMe</b>                                                                                                               | 15 |
| S9. Characterization of <b>FelMPh(Br)</b>                                                                                                           | 17 |
| S10. Crystallographic details                                                                                                                       | 19 |
| S11. Stability studies                                                                                                                              | 21 |
| S12. NMR spectra of <b>[Fe(tpy)<sub>2</sub>]Cl<sub>2</sub></b> and triphenylphosphine oxide from the reaction between <b>FelMPh</b> and terpyridine | 23 |
| S13. Cyclic voltammogram of ferrocene                                                                                                               | 24 |

## S1. General Considerations

All reactions were carried out under nitrogen atmosphere using Schlenk techniques. THF and Et<sub>2</sub>O were distilled over sodium prior to use. Pyridine-2,6-dicarboxylic acid, Na<sub>2</sub>CO<sub>3</sub>, NaBH<sub>4</sub> and PBr<sub>3</sub> were purchased from Sigma-Aldrich and NaN<sub>3</sub> was purchased from MCF chemicals. All purchased reagents were used as received. The precursor FeCl<sub>2</sub>py<sub>4</sub> was prepared according to the literature [1].

<sup>1</sup>H, <sup>13</sup>C NMR and <sup>31</sup>P spectra were carried out in CDCl<sub>3</sub> on a JEOL GX 300 spectrometer (300.5296 MHz for <sup>1</sup>H, 75.5682 MHz for <sup>13</sup>C and 121.5 MHz for <sup>31</sup>P). The δ scale is used throughout; chemical shifts are in ppm, and the coupling constants are in Hz. The samples of the iron complexes were prepared in an inert atmosphere and transferred to an NMR tube coupled to a J Young valve. FAB+ mass spectra were obtained using a JEOL JMS-SX102A instrument with m-nitrobenzyl alcohol as matrix. DART mass spectra were obtained using Joel AccuTOF JMS-T100LC instrument. Infrared spectra were performed on a Bruker Alpha ATR spectrometer with neat samples of the compounds.

## S2. Synthesis of PyN3

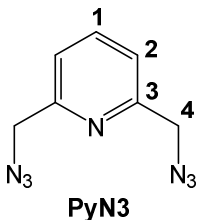

In a Schlenk flask, 0.305 g (4.69 mmol) of NaN<sub>3</sub> were slowly added to a solution of 0.50 g (1.88 mmol) of PyBr in 10 mL of DMSO. The reaction mixture was left in agitation for 12 hours followed by the addition of 10 mL of water. Extractions were performed with 3 x 20 mL of diethylether. The organic phase was washed with 40 mL of a saturated NaCl solution, then dried over Na<sub>2</sub>SO<sub>4</sub>, and the solvent was evaporated to dryness under vacuum. A yellow oil corresponding to **PyN3** was obtained in 65 % yield (0.230 g, 1.22 mmol).

<sup>1</sup>H NMR (CDCl<sub>3</sub>, 300 MHz) 7.76 (t, *J*<sub>HH</sub> = 8.0, 1H, H1), 7.30 (d, *J*<sub>HH</sub> = 8.0, 2H, H2), 4.48 (s, 4H, H4). <sup>13</sup>C {<sup>1</sup>H} NMR (CDCl<sub>3</sub>, 75 MHz) δ = 155.9 (C3), 138.0 (C1), 121.1 (C2), 55.4 (C4).

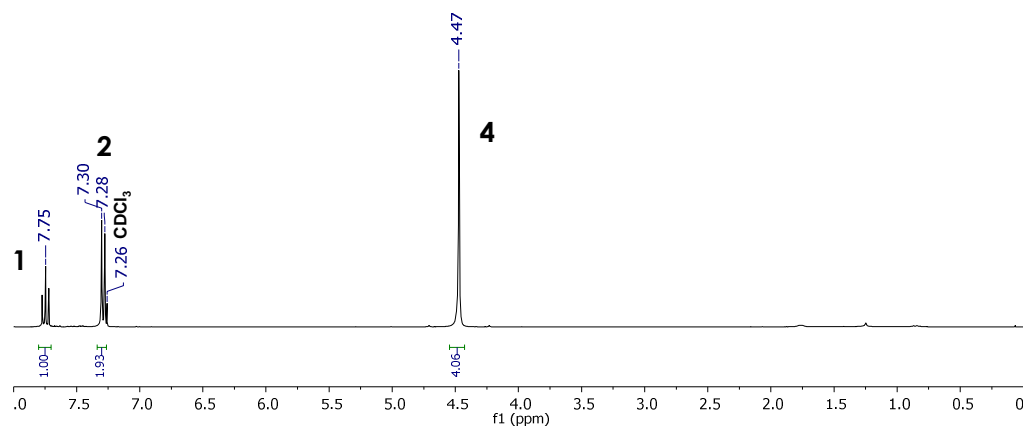

<sup>1</sup>H NMR spectrum for **PyN3** (CDCl<sub>3</sub>, 300 MHz, 298 K).

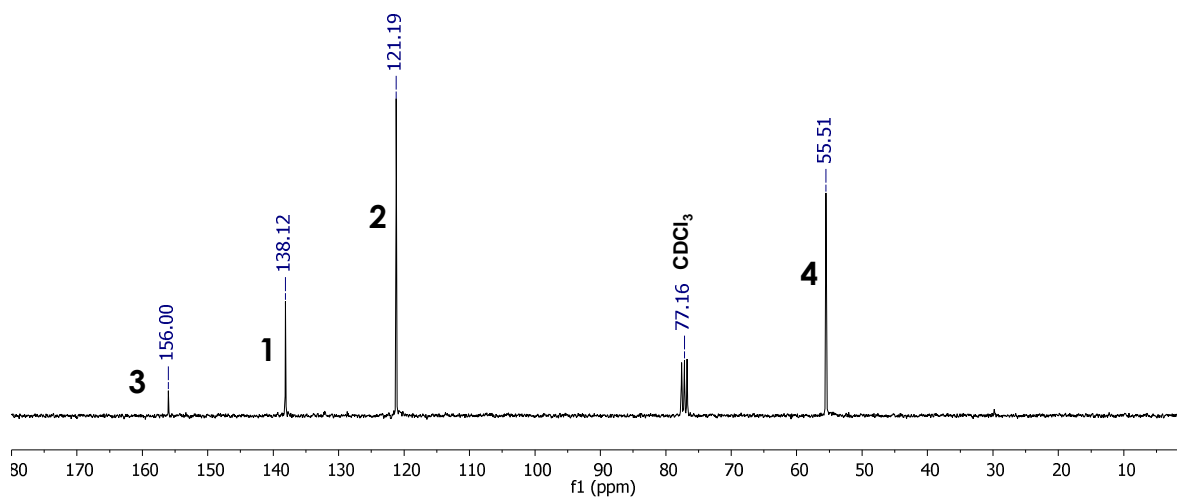

<sup>13</sup>C {<sup>1</sup>H} NMR spectrum for **PyN3** (CDCl<sub>3</sub>, 75 MHz, 298 K).

### S3. Synthesis of ImPh [2]

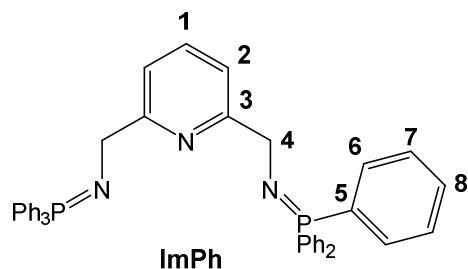

In a Schlenk flask, 0.277 g (1.056 mmol) of  $\text{PPh}_3$  were slowly added to solution of 0.10 g (0.528 mmol) of **PyN3** in 10 mL of diethylether, and the reaction mixture was stirred at room temperature for 12 hours. The solvent was concentrated under vacuum to about 5 mL, and the white precipitate was filtered off through a canula fitted with filter paper, then washed with 30 mL of cold diethylether, and dried under vacuum. The white solid corresponding to **ImPh** was obtained in 65 % yield (0.225 g, 0.343 mmol).

$^{31}\text{P}\{^1\text{H}\}$  NMR ( $\text{CDCl}_3$ , 121 MHz) 12.0 (s).  $^1\text{H}$  NMR ( $\text{CDCl}_3$ , 300 MHz) 7.79–7.59 (m, 15H, H1, H2, H6), 7.57–7.30 (m, 18H, H7, H8), 4.30 (d,  $J_{\text{PH}} = 18.0$ , 4H, H4). MS (DART):  $m/z$ , 657. IR ( $\nu \text{ cm}^{-1}$ ): 1105 ( $\nu_{\text{N=P}}$ ).

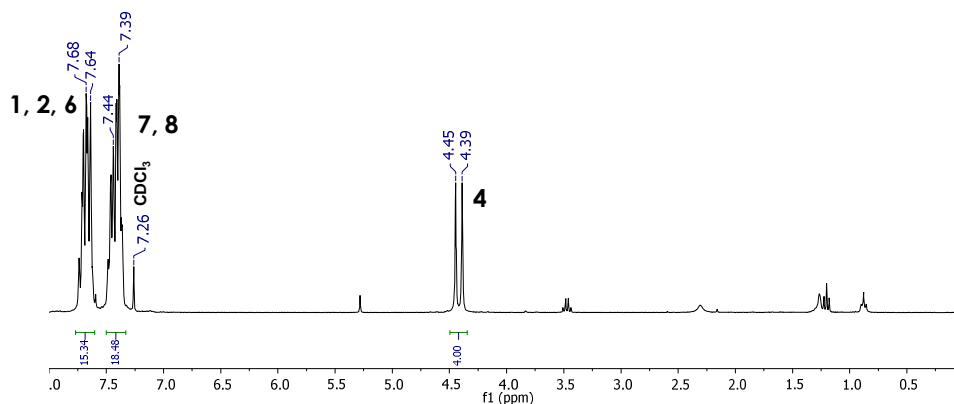

$^1\text{H}$  NMR spectrum for **ImPh** ( $\text{CDCl}_3$ , 300 MHz, 298 K).

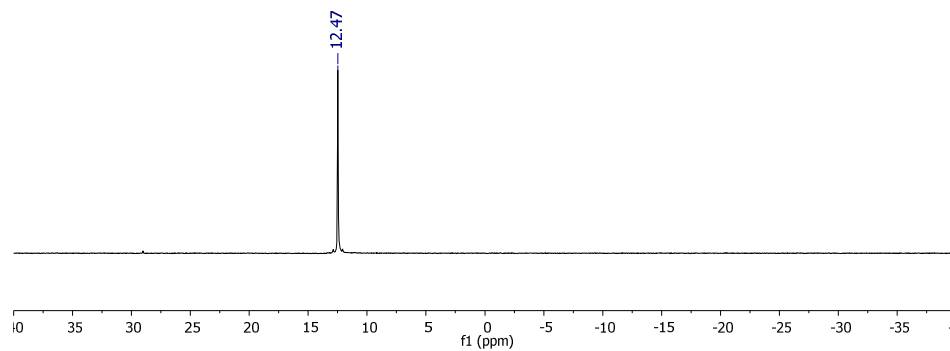

<sup>31</sup>P {<sup>1</sup>H} NMR spectrum for **ImPh** (CDCl<sub>3</sub>, 121 MHz, 298 K).

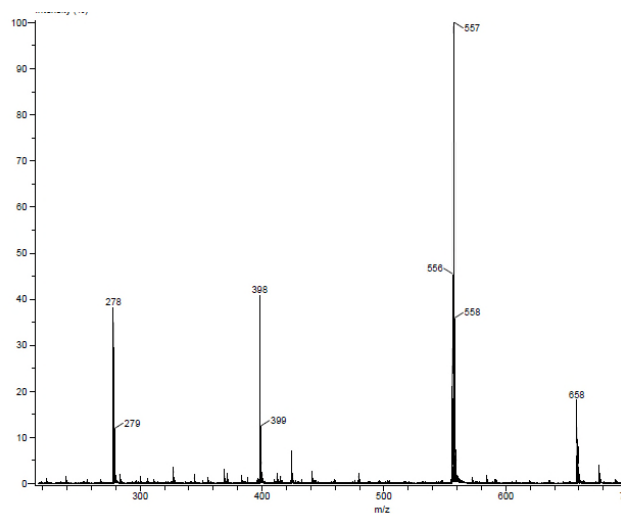

MS(DART) for **ImPh**.

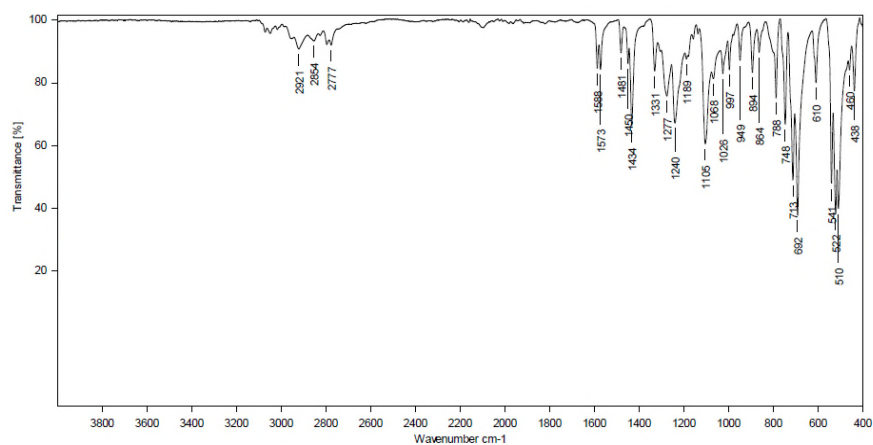

ATR-IR spectrum for **ImPh**.

## S4. Characterization of ImBu

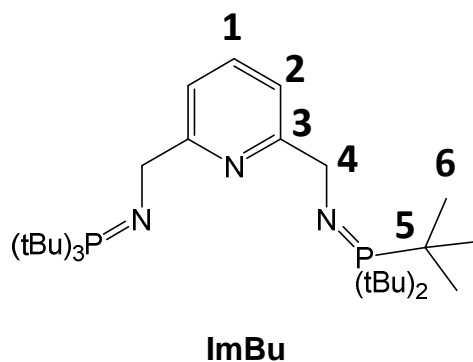

$^{31}\text{P}\{^1\text{H}\}$  NMR ( $\text{CDCl}_3$ , 121 MHz) 53.65 (s).  $^1\text{H}$  NMR ( $\text{CDCl}_3$ , 300 MHz) 7.44 (t,  $J_{\text{HH}} = 8.6$  Hz, 1H, H1), 7.17 (d,  $J_{\text{HH}} = 9.0$ , 2H, H2), 4.92 (s, 4H, H4), 1.43 (d,  $J_{\text{PH}} = 12.0$ , 54H, H6). IR ( $\nu \text{ cm}^{-1}$ ): 1109 ( $\nu_{\text{N=P}}$ ).

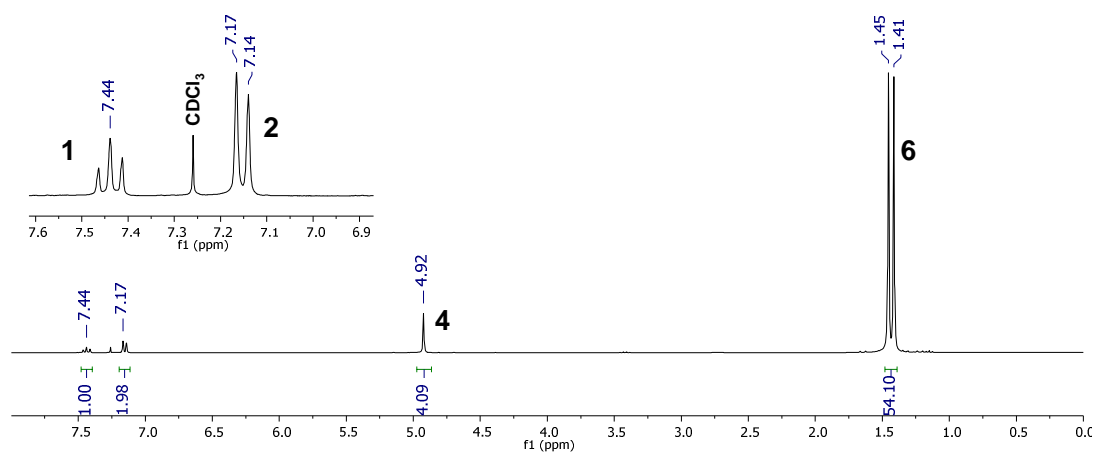

$^1\text{H}$  NMR spectrum for **ImBu** ( $\text{CDCl}_3$ , 300 MHz, 298 K).

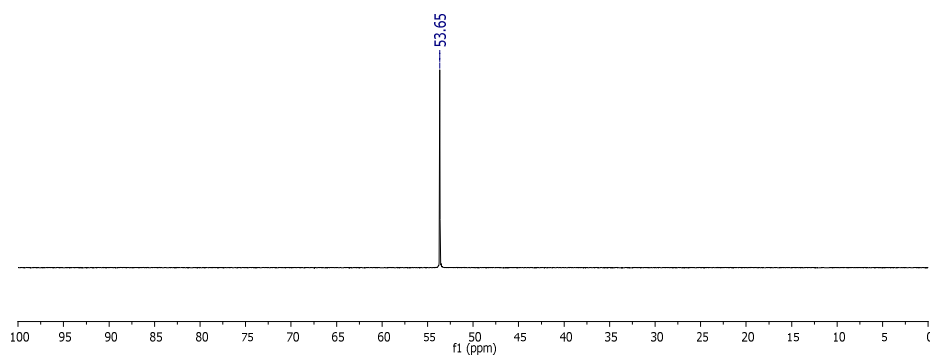

$^{31}\text{P}\{^1\text{H}\}$  NMR spectrum for **ImBu** ( $\text{CDCl}_3$ , 121 MHz, 298 K).

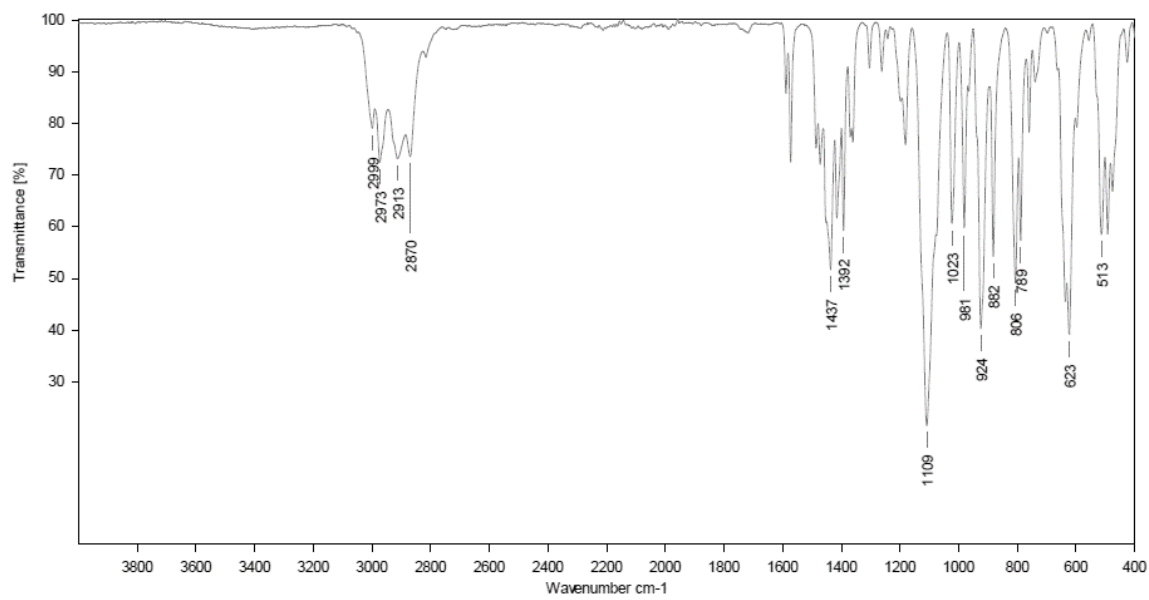

ATR-IR spectrum for **ImBu**.

## S5. Characterization of ImMe

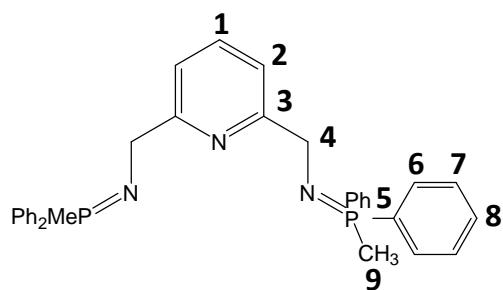

**ImMe**

$^{31}\text{P}\{^1\text{H}\}$  NMR ( $\text{CDCl}_3$ , 121 MHz) 12.85 (s).  $^1\text{H}$  NMR ( $\text{CDCl}_3$ , 300 MHz) 7.66–7.54 (m, 12H, H1, H2, H6), 7.42–7.31 (m, 13H, H7, H8), 4.28 (d,  $J_{\text{PH}} = 21.0$ , 4H, H4) 1.91 (d,  $J_{\text{PH}} = 12.0$ , 6H, H9). MS (DART):  $m/z$ , 534.

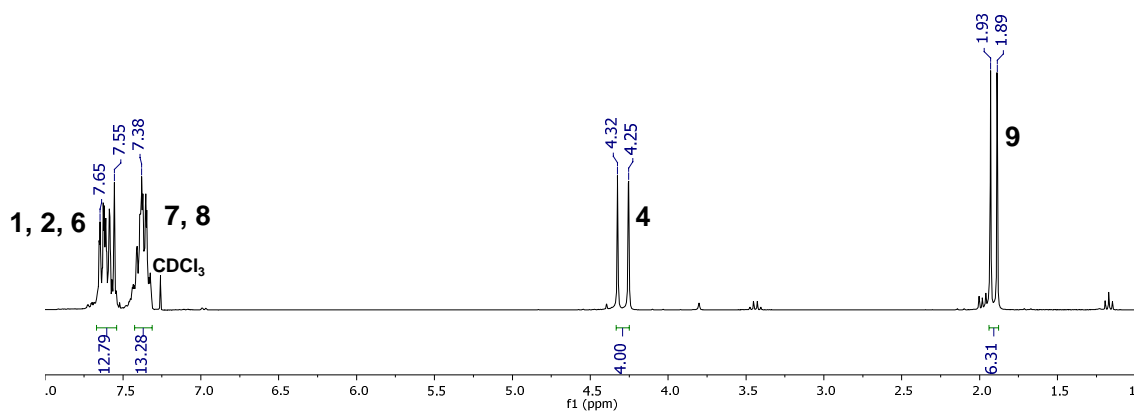

$^1\text{H}$  NMR spectrum for **ImMe** ( $\text{CDCl}_3$ , 300 MHz, 298 K).

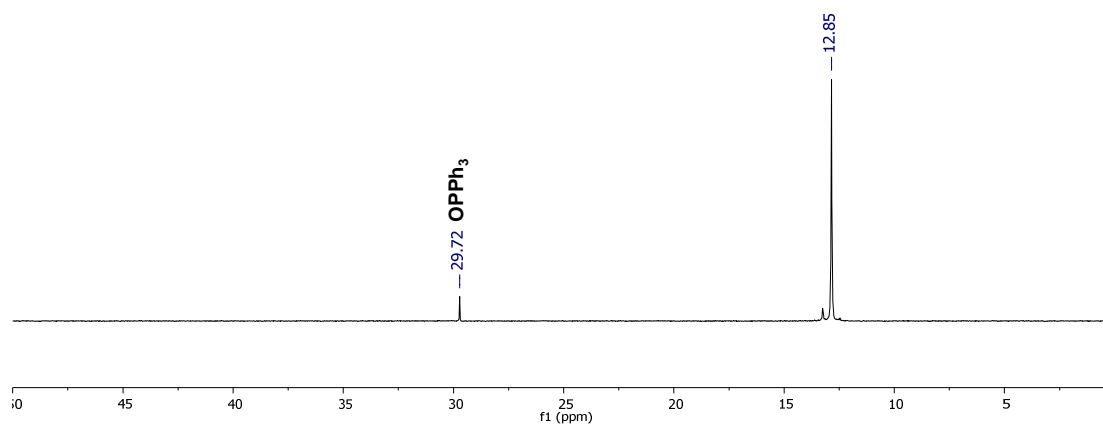

$^{31}\text{P}\{^1\text{H}\}$  NMR spectrum for **ImMe** ( $\text{CDCl}_3$ , 121 MHz, 298 K).



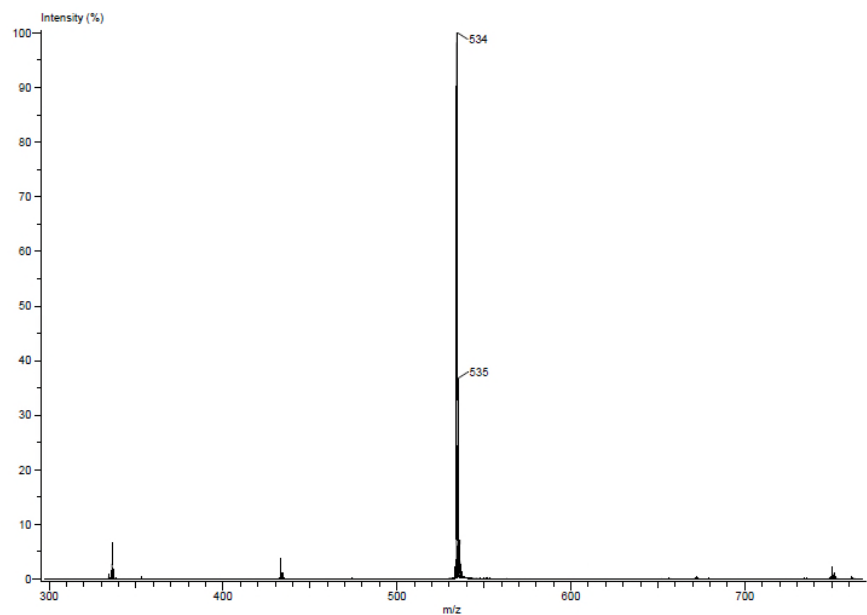

MS(DART) for **ImMe**.

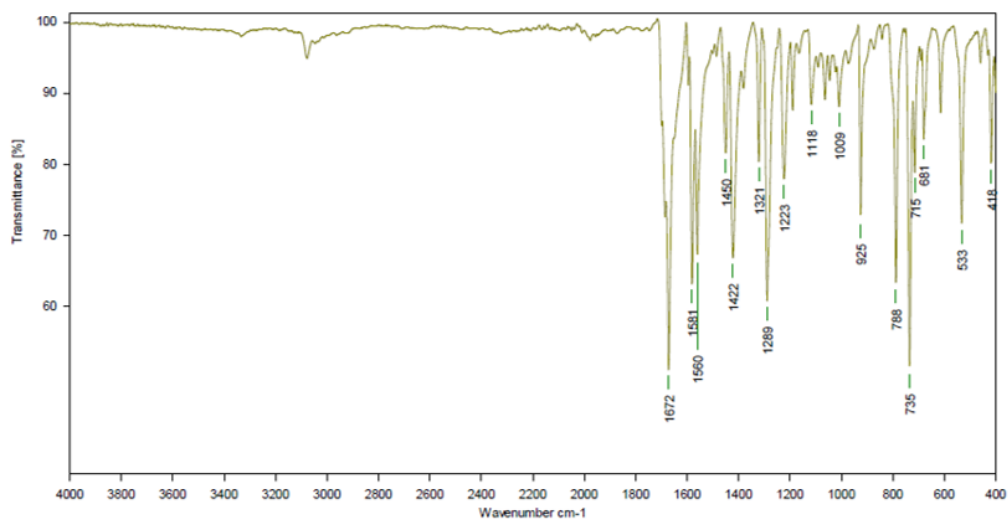

ATR-IR spectrum for **ImMe**.

## S6. Characterization of FeImPh

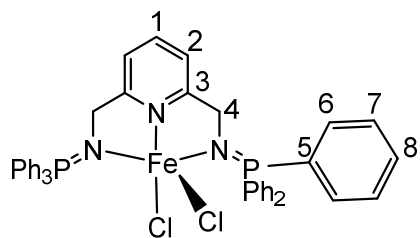

**FeImPh**

$^{31}\text{P}\{^1\text{H}\}$  NMR ( $\text{CDCl}_3$ , 121 MHz) 38.64 (s).  $^1\text{H}$  NMR ( $\text{CDCl}_3$ , 300 MHz) 7.45-7.90 (m, 34H, H1, H2, H6, H7, H8), 4.15 (d,  $J_{\text{PH}} = 18$ , 4H, H4). MS (ESI $^{+}$ ):  $m/z$ , 783.6. IR ( $\nu$   $\text{cm}^{-1}$ ): 1113 ( $\nu_{\text{N=P}}$ ). Anal Calcd for  $\text{C}_{43}\text{H}_{37}\text{Cl}_2\text{FeN}_3\text{P}_2 \cdot 0.75 \text{CH}_2\text{Cl}_2$ : N, 5.00; C, 62.36; H, 4.59. Found: N, 5.21; C, 62.03; H, 4.69.

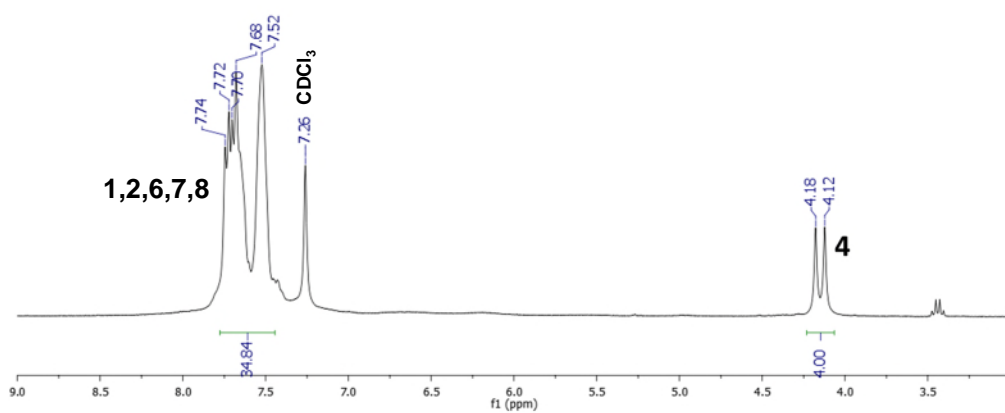

$^1\text{H}$  NMR spectrum for **FeImPh** ( $\text{CDCl}_3$ , 300 MHz, 298 K).

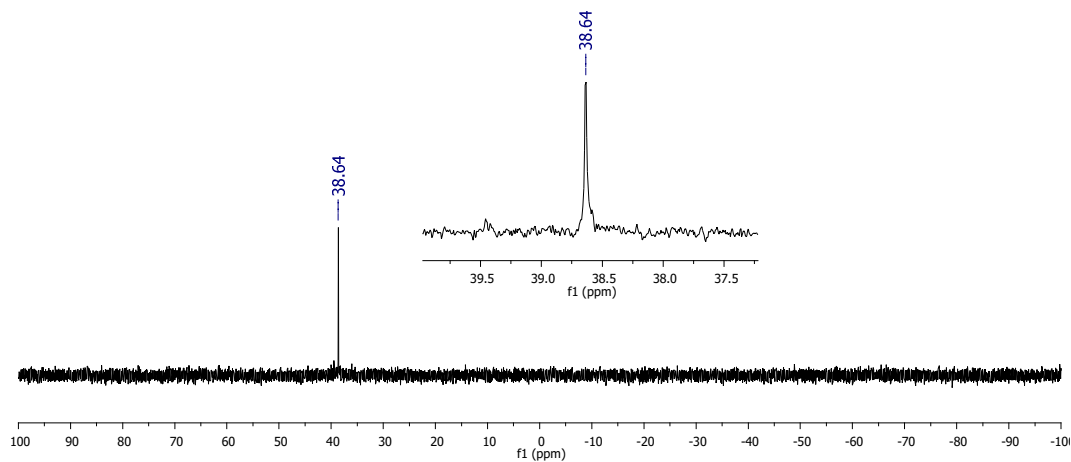

$^{31}\text{P}\{^1\text{H}\}$  NMR spectrum for **FeImPh** ( $\text{CDCl}_3$ , 121 MHz, 298 K).

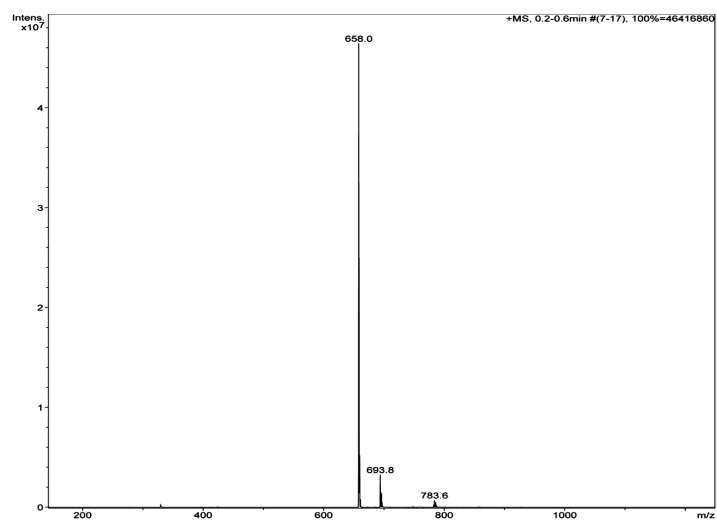

MS(ESI) for **FeImPh**.

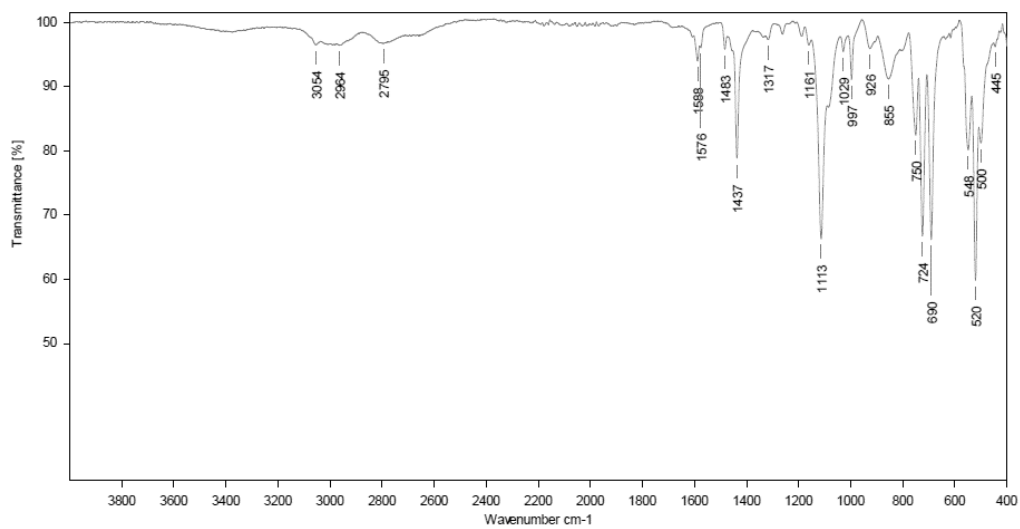

ATR-IR spectrum for **FeImPh**.

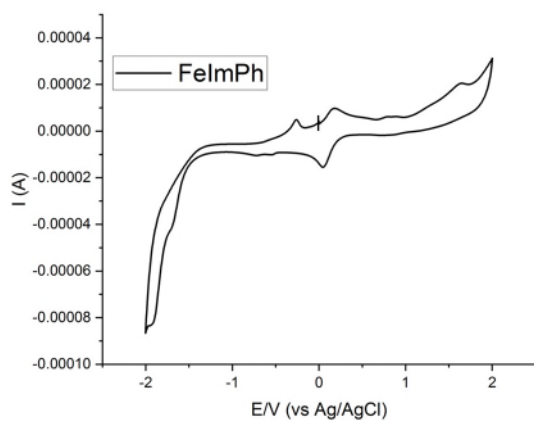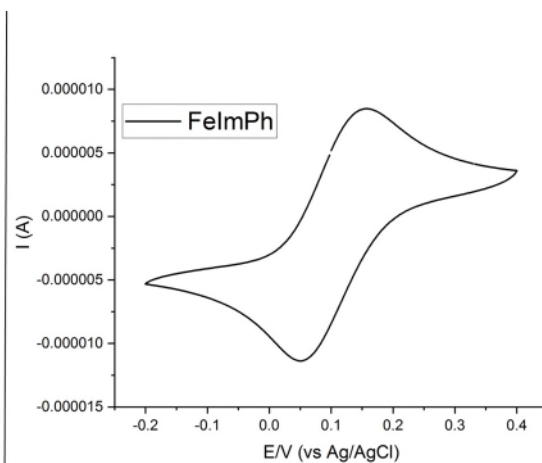

Cyclic voltammetry of complex **FeImPh** (0.1 M *n*Bu<sub>4</sub>NPF<sub>6</sub>, 100 mVs<sup>-1</sup>, glassy carbon, Ag/AgCl, 25 °C, 1×10<sup>-4</sup> M in CH<sub>2</sub>Cl<sub>2</sub>).

## S7. Characterization of FelmBu

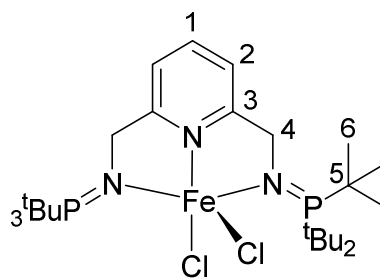

**FelmBu**

$^{31}\text{P}\{^1\text{H}\}$  NMR ( $\text{CDCl}_3$ , 121 MHz) 69.75 (s).  $^1\text{H}$  NMR ( $\text{CDCl}_3$ , 300 MHz) 7.61 (s, 1H, H1), 7.47 (s, 2H, H2), 3.74 (s, 4H, H4), 1.26-1.22 (m, 54H, H6). IR ( $\nu_{\text{N}=\text{P}}$ ): 1173 ( $\nu_{\text{N}=\text{P}}$ ).

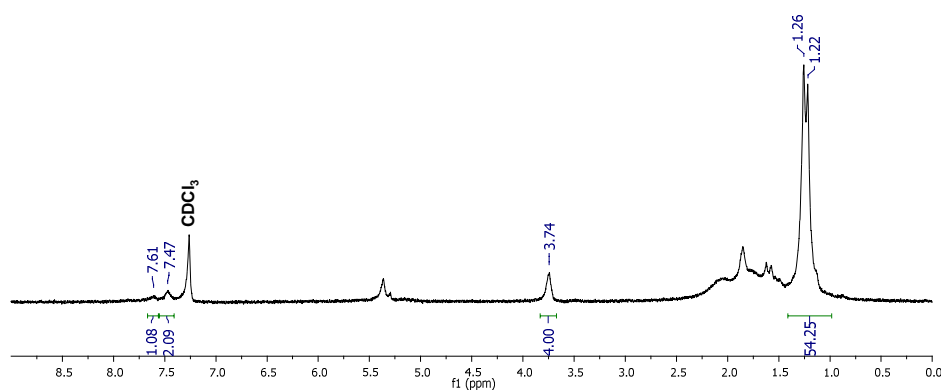

$^1\text{H}$  NMR spectrum for **FelmBu** ( $\text{CDCl}_3$ , 300 MHz, 298 K).

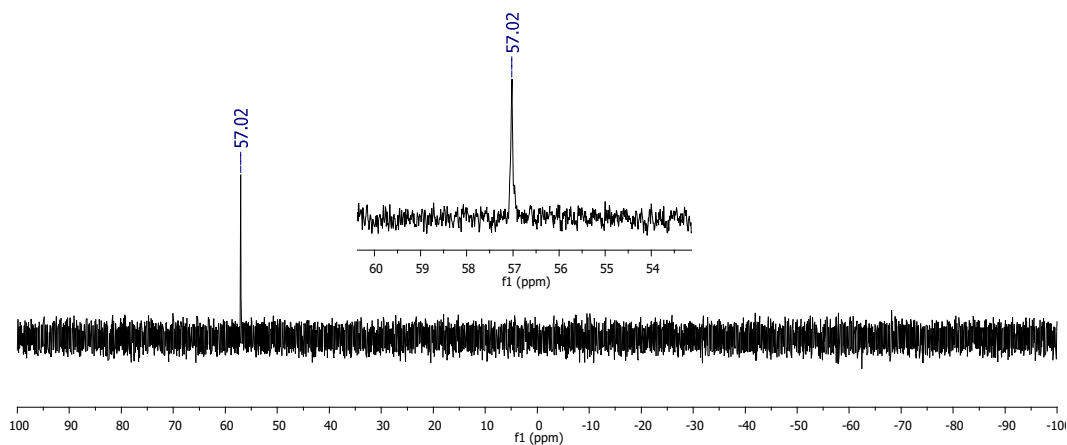

$^{31}\text{P}\{^1\text{H}\}$  NMR spectrum for **FelmBu** ( $\text{CDCl}_3$ , 300 MHz, 298 K).

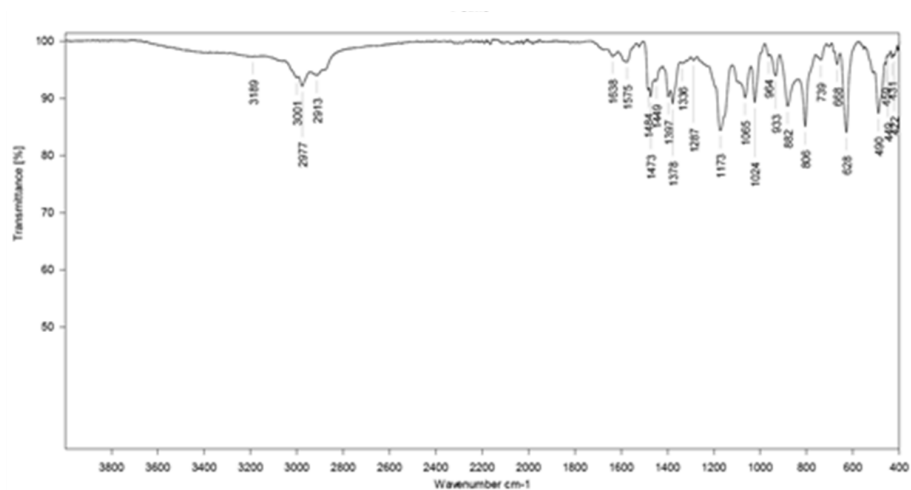

ATR-IR spectrum for **FelmBu**.

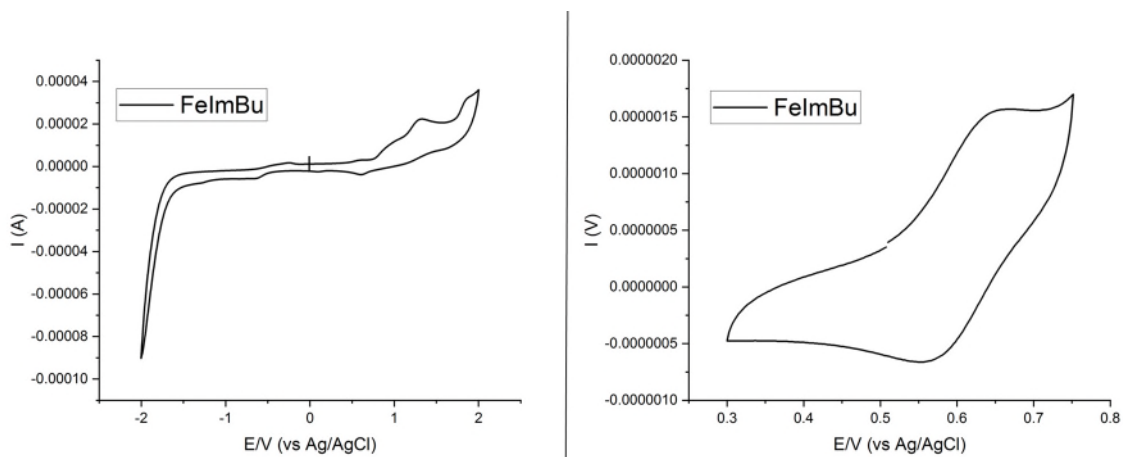

Cyclic voltammetry of complex **FelmBu** (0.1 M  $n\text{Bu}_4\text{NPF}_6$ , 100  $\text{mVs}^{-1}$ , glassy carbon, Ag/AgCl, 25 °C,  $1 \times 10^{-4}$  M in  $\text{CH}_2\text{Cl}_2$ ).

## S8. Characterization of FelmMe

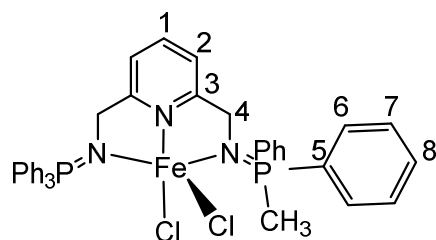

**FelmMe**

$^{31}\text{P}\{^1\text{H}\}$  NMR ( $\text{CDCl}_3$ , 121 MHz) 42.31 (s).  $^1\text{H}$  NMR ( $\text{CDCl}_3$ , 300 MHz) 7.81-7.47 (m, 23H, H1, H2, H3, H6, H7, H8), 4.19 (m, 4H, H4), 2.66 (m, 6H,  $\text{CH}_3$ ). MS (DART):  $m/z$ , 660. IR ( $\nu \text{ cm}^{-1}$ ): 1118 ( $\nu_{\text{N}=\text{P}}$ ).

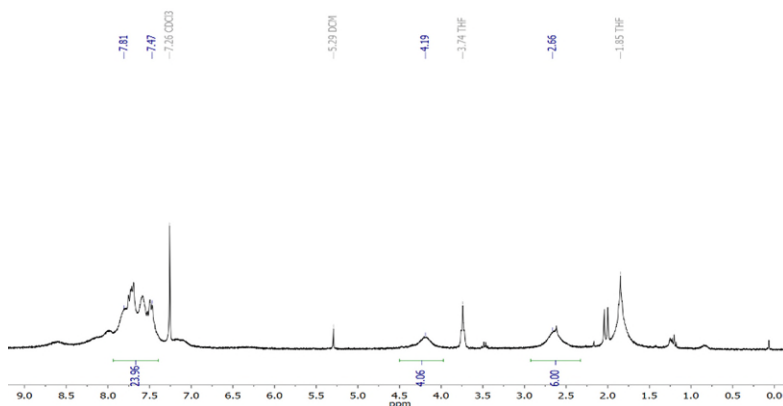

$^1\text{H}$  NMR spectrum for **FelmMe** ( $\text{CDCl}_3$ , 121 MHz, 298 K).

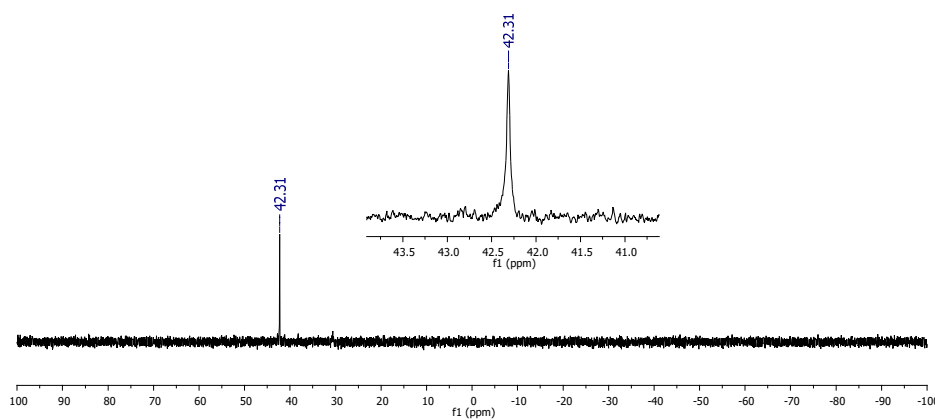

$^{31}\text{P}\{^1\text{H}\}$  NMR spectrum for **FelmMe** ( $\text{CDCl}_3$ , 121 MHz, 298 K).

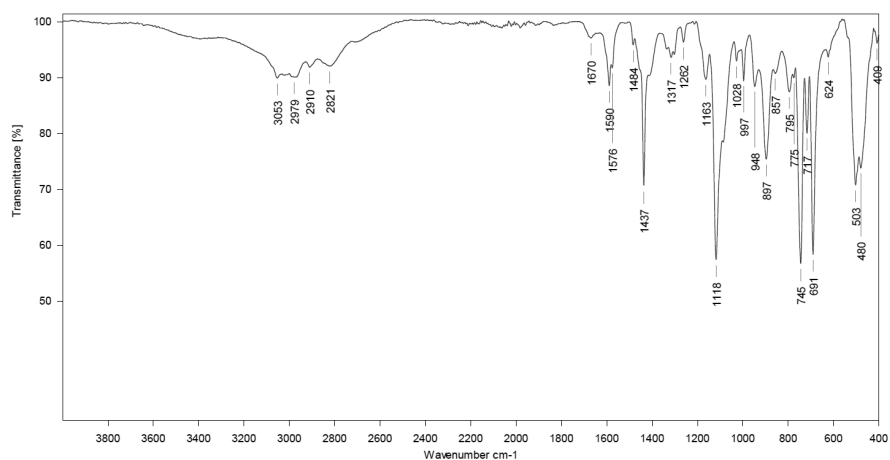

ATR-IR spectrum for **FelmMe**.

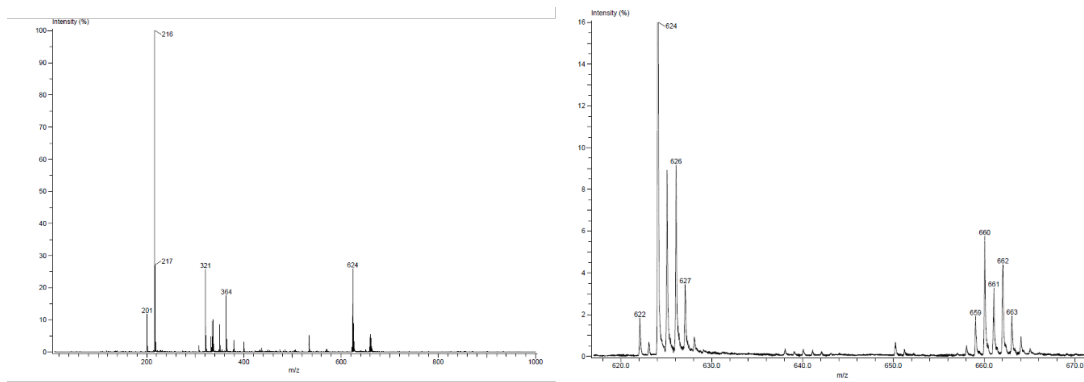

MS(DART) for **FelmMe**.

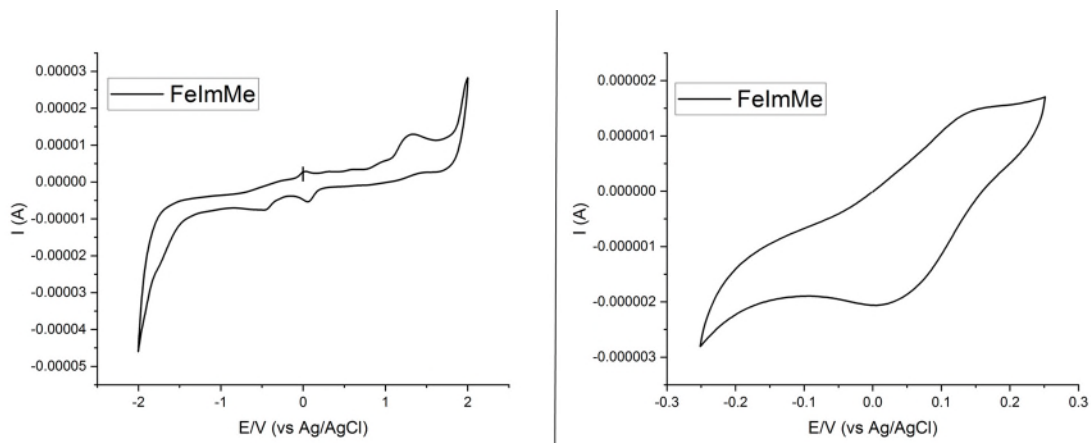

Cyclic voltammetry of complex **FelmMe** (0.1 M  $n\text{Bu}_4\text{NPF}_6$ , 100  $\text{mVs}^{-1}$ , glassy carbon, Ag/AgCl, 25 °C,  $1 \times 10^{-4}$  M in  $\text{CH}_2\text{Cl}_2$ ).



## S9. Characterization of FelmPh(Br)

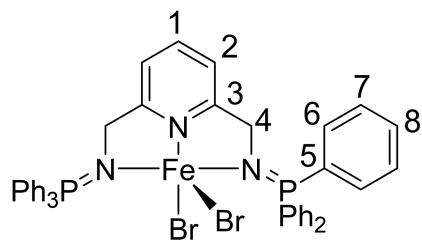

**FelmPh(Br)**

$^{31}\text{P}\{^1\text{H}\}$  NMR ( $\text{CDCl}_3$ , 121 MHz) 42.31 (s).  $^1\text{H}$  NMR ( $\text{CDCl}_3$ , 300 MHz) 8.61 (s, 4H) 7.73-7.28 (m, 27H), 6.24 (s, 2H), 4.22 (s, 4H). MS(ESI $^+$ )  $m/z$  Calcd for  $\text{C}_{43}\text{H}_{37}\text{Br}_2\text{FeN}_3\text{P}_2$   $[\text{M}+\text{H}]^+$ : 874.02; found: 874.2. IR ( $\nu \text{ cm}^{-1}$ ): 1116 ( $\nu_{\text{N}=\text{P}}$ ).

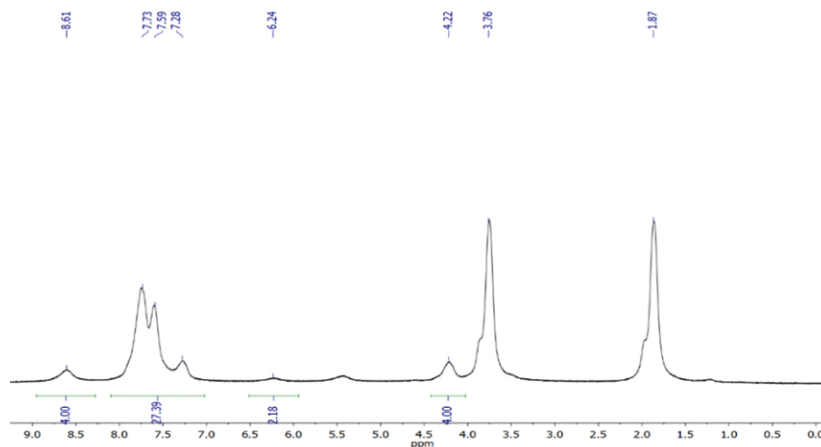

$^1\text{H}$  NMR spectrum of **FelmPhBr** ( $\text{CDCl}_3$ , 300 MHz, 298 K).

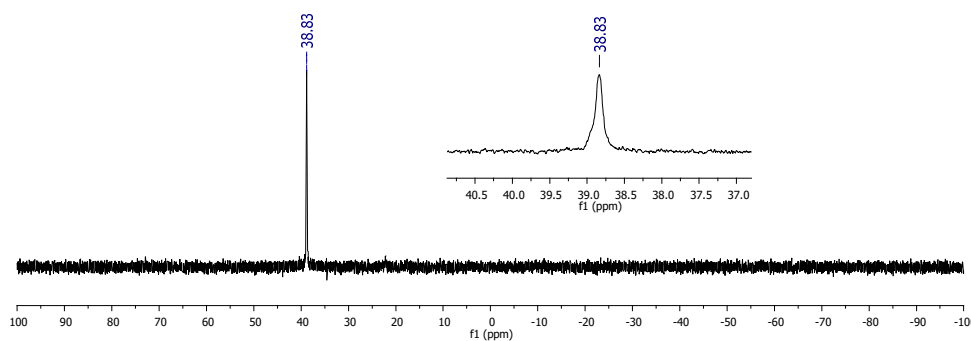

$^{31}\text{P}\{^1\text{H}\}$  NMR spectrum of **FelmPhBr** ( $\text{CDCl}_3$ , 121 MHz, 298 K).

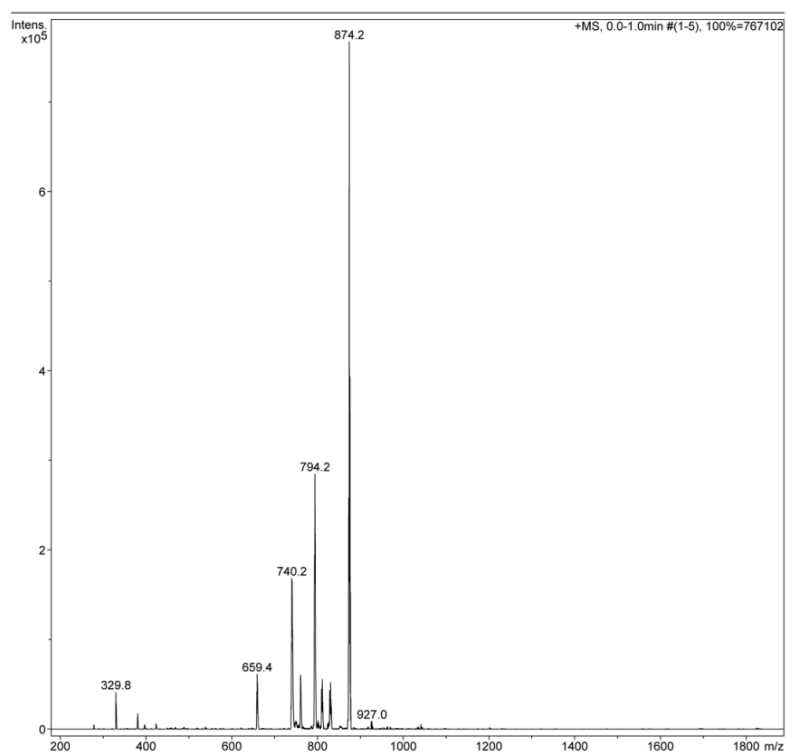

MS(ESI) of **FeImPhBr**

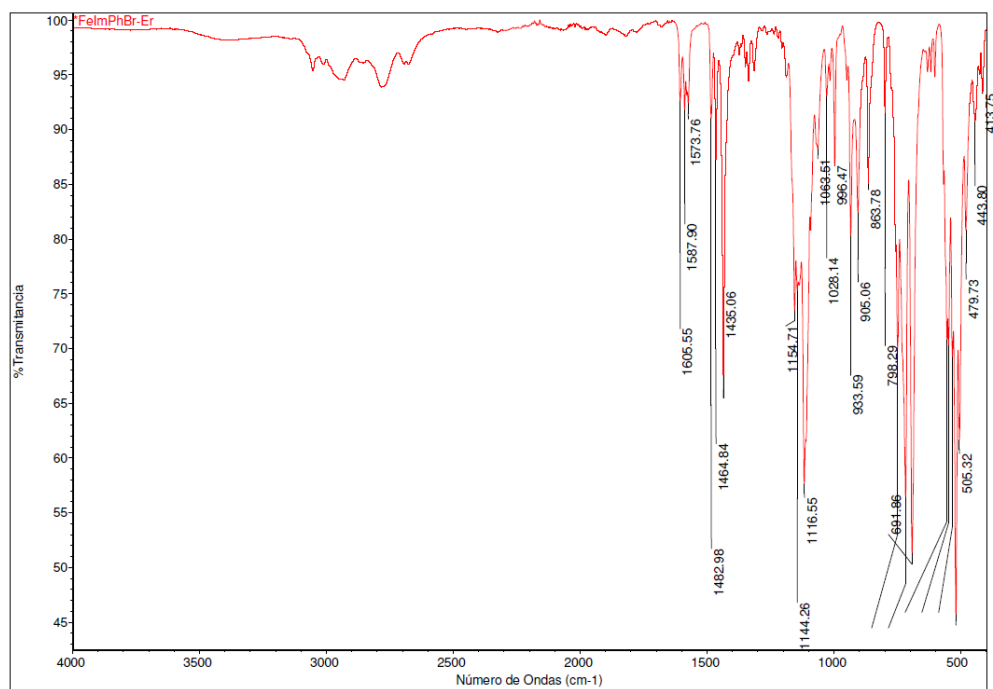

ATR-IR spectrum of **FeImPhBr**

## S10. Crystallographic Details

### Crystallographic Data for **Fe2ImPh**.

|                                                  |                                                                                                         |
|--------------------------------------------------|---------------------------------------------------------------------------------------------------------|
| Empirical formula                                | C <sub>43</sub> H <sub>37</sub> Cl <sub>4</sub> Fe <sub>2</sub> N <sub>3</sub> OP <sub>2</sub>          |
| Formula weight                                   | 927.19                                                                                                  |
| Temperature (K)                                  | 298                                                                                                     |
| Wavelength (Å)                                   | 0.71073                                                                                                 |
| Crystal system                                   | Triclinic                                                                                               |
| Space group                                      | P -1                                                                                                    |
| Unit cell dimensions (in Å and °)                | a = 13.361(6)    α = 105.615(14)<br>b = 14.758(7)    β = 96.300(14)<br>c = 16.070(8)    γ = 111.913(13) |
| Volume (Å <sup>3</sup> )                         | 2752(2)                                                                                                 |
| Z                                                | 2                                                                                                       |
| Density (g/cm <sup>3</sup> , calculated)         | 1.119                                                                                                   |
| Absorption coeff. (mm <sup>-1</sup> )            | 0.808                                                                                                   |
| F(000)                                           | 948.0                                                                                                   |
| Crystal size (mm)                                | 0.411 × 0.273 × 0.252                                                                                   |
| Θ range for data collection (°)                  | 2.30 to 28.39                                                                                           |
| Index ranges                                     | -17 ≤ h ≤ 17<br>-19 ≤ k ≤ 19<br>-21 ≤ l ≤ 21                                                            |
| Reflections collected                            | 13654                                                                                                   |
| Independent reflections                          | 9594                                                                                                    |
| Absorption correction                            | None                                                                                                    |
| Refinement method                                | Full-matrix least-squares on F <sup>2</sup>                                                             |
| Data/restraints/parameters                       | 13654/0/496                                                                                             |
| Goodness of fit on F <sup>2</sup>                | 0.960                                                                                                   |
| Final R indices [I > 2σ(I)]                      | R1 = 0.0739, wR2 = 0.1972                                                                               |
| R indices (all data)                             | R1 = 0.1541, wR2 = 0.1927                                                                               |
| Largest diff. Peak and hole (e·Å <sup>-3</sup> ) | 0.651 to -0.476                                                                                         |

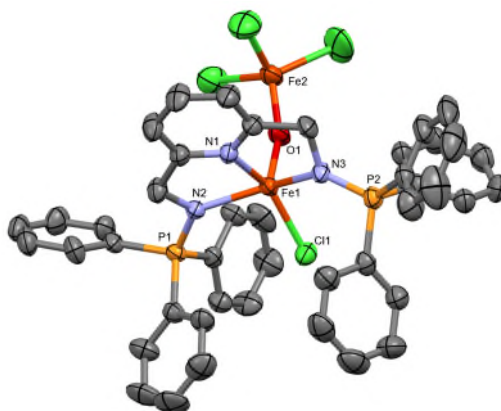

| Bond lengths | (Å)        |
|--------------|------------|
| Fe1-O1       | 1.776(3)   |
| Fe1-N1       | 2.096(4)   |
| Fe1-N3       | 2.132(4)   |
| Fe1-N2       | 2.136(3)   |
| Fe1-Cl1      | 2.2421(16) |
| Fe2-O1       | 1.764(3)   |
| P1-N2        | 1.612(3)   |
| P2-N3        | 1.594(4)   |

**Table S1.** Select bond lengths (Å) of complex **Fe2ImPh**.

| Bond angles | (°)        |
|-------------|------------|
| O1-Fe1-N1   | 100.28(14) |
| O1-Fe1-N3   | 100.34(14) |
| O1-Fe1-N2   | 106.73(13) |
| N1-Fe1-N3   | 75.06(14)  |
| N1-Fe1-N2   | 76.11(14)  |
| N3-Fe1-N2   | 143.32(14) |
| Fe2-O1-Fe1  | 158.3(2)   |
| P1-N2-Fe1   | 128.6(2)   |
| P2-N3-Fe1   | 127.5(2)   |
| N1-Fe1-Cl1  | 147.91(11) |
| N3-Fe1-Cl1  | 95.39(11)  |
| N2-Fe1-Cl1  | 97.10(10)  |
| O1-Fe1-Cl1  | 111.63(12) |

**Table S2.** Select bond angles (°) of complex **Fe2ImPh**.

## S11. Stability studies

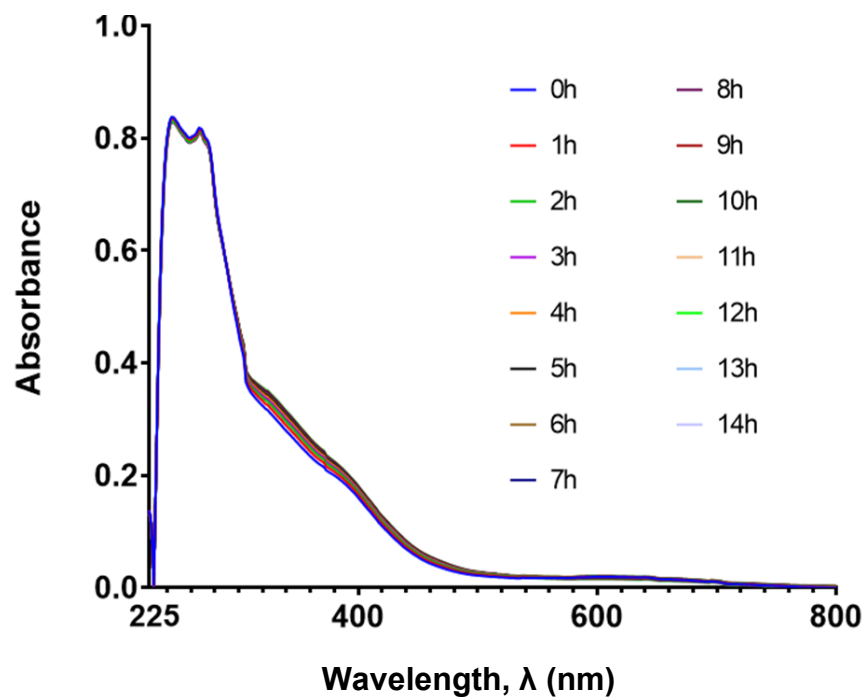

Electronic absorption spectra of **FeImPh** in CH<sub>2</sub>Cl<sub>2</sub> solution,  $9.63 \times 10^{-5}$  M at 25 °C.

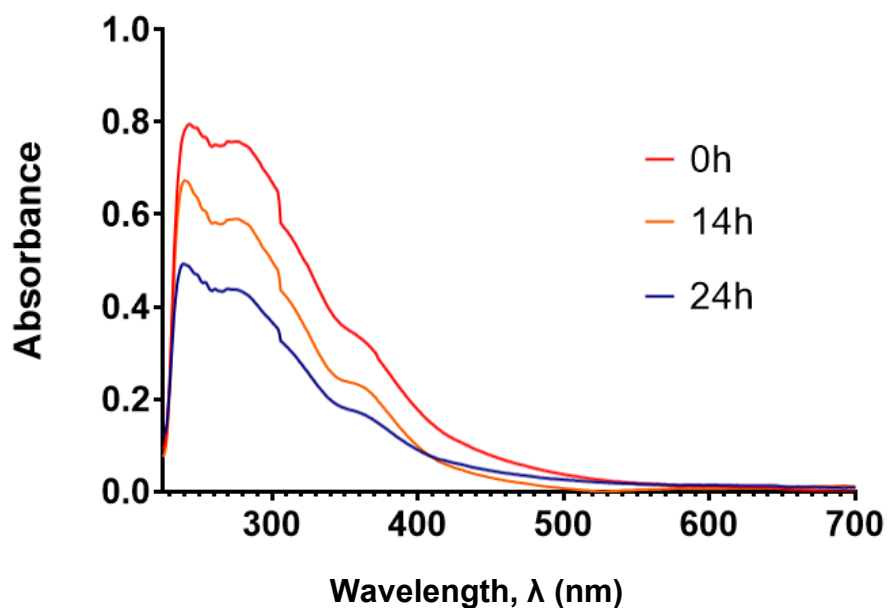

Electronic absorption spectra of **FeImBu** in CH<sub>2</sub>Cl<sub>2</sub> solution,  $9.63 \times 10^{-5}$  M at 25 °C.

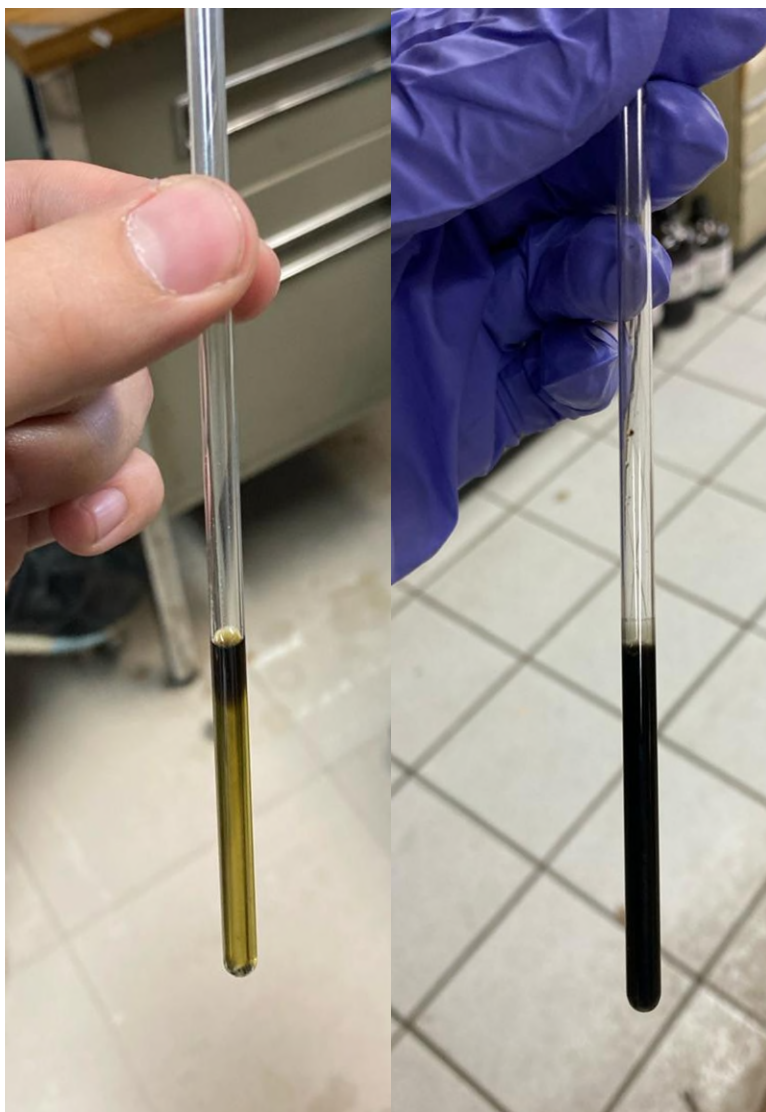

**FeImBu** in  $\text{CDCl}_3$  solution upon contact with atmospheric conditions, 30 minutes (left) and 4 hours (right)

**S12. Characterization of  $[\text{Fe}(\text{tpy})_2]\text{Cl}_2$  and triphenylphosphine oxide from the reaction between FeImPh and terpyridine**

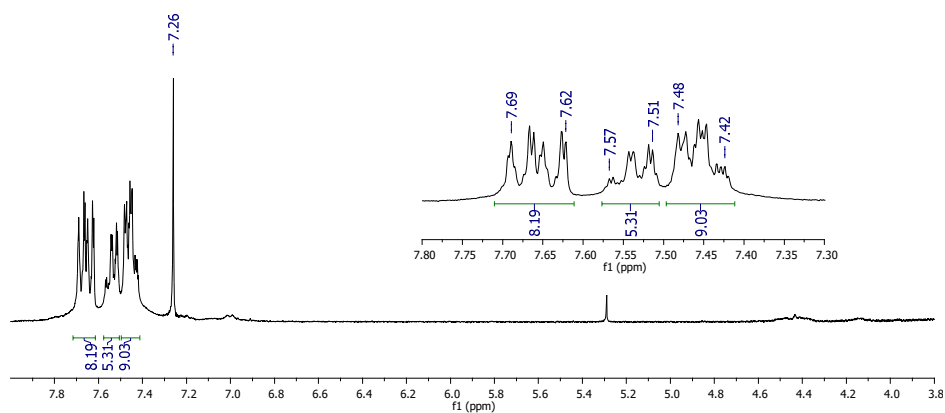

$^1\text{H}$  NMR spectrum of  $[\text{Fe}(\text{tpy})_2]\text{Cl}_2$  ( $\text{CDCl}_3$ , 300 MHz, 298 K).

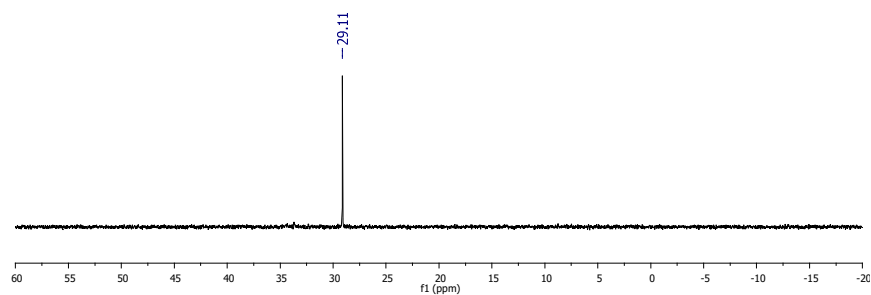

$^{31}\text{P}$   $\{^1\text{H}\}$  NMR spectrum for  $\text{OPPh}_3$  ( $\text{CDCl}_3$ , 121 MHz, 298 K).

### S13. Cyclic voltammogram of ferrocene

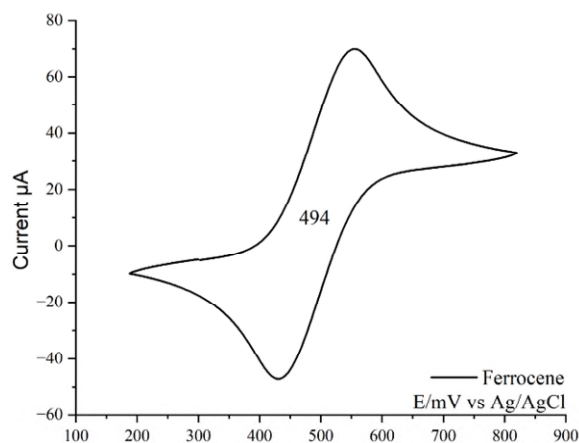

Cyclic voltammetry of ferrocene (0.1 M  $n\text{Bu}_4\text{NPF}_6$ , 100  $\text{mVs}^{-1}$ , glassy carbon, Ag/AgCl, 25 °C,  $1 \times 10^{-3}$  M in  $\text{CH}_2\text{Cl}_2$ ).

### References

1. Wu, J.Y.; Stanzl, B.N.; Ritter, T. A strategy for the synthesis of well-defined iron catalysts and application to regioselective diene hydrosilylation. *J Am Chem Soc* **2010**, *132*, 13214-13216, doi:10.1021/ja106853y.
2. Cheisson, T.; Auffrant, A. Versatile coordination chemistry of a bis(methyliminophosphoranyl)pyridine ligand on copper centres. *Dalton Trans* **2014**, *43*, 13399-13409, doi:10.1039/c4dt01794c.
